# Supplementary material
Source: HighWire-hosted journal article supplement (https://bmjopen.bmj.com/content/6/4/e010700)
Supplement: inline-supplementary-material-1 [file inline-supplementary-material-1.pdf]

Supplementary file 1: Percentages of types and severity level of the adverse events identified in the large and small sample.

[illegible]

|                                  |      |      |     |     |     |       |      |      |     |     |     |       |                  |
|----------------------------------|------|------|-----|-----|-----|-------|------|------|-----|-----|-----|-------|------------------|
| Medical technical harm           | 1 %  | 1 %  | 0 % | 0 % | 0 % | 2 %   | 0 %  | 0 %  | 0 % | 0 % | 0 % | 0 %   |                  |
| Deterioration and cronic illness | 0 %  | 0 %  | 0 % | 0 % | 0 % | 1 %   | 0 %  | 0 %  | 0 % | 0 % | 0 % | 0 %   |                  |
| <b>Medication harm</b>           | 5 %  | 4 %  | 0 % | 0 % | 0 % | 10 %  | 0 %  | 7 %  | 2 % | 0 % | 0 % | 9 %   | 1.68 (0.60-4.66) |
| <b>Obstetric harm</b>            | 1 %  | 0 %  | 0 % | 0 % | 0 % | 2 %   | 0 %  | 0 %  | 0 % | 0 % | 0 % | 0 %   | NA               |
| <b>Pressure ulcer</b>            | 2 %  | 0 %  | 0 % | 0 % | 0 % | 2 %   | 2 %  | 2 %  | 0 % | 0 % | 0 % | 4 %   | 0.73 (0.16-3.33) |
| <b>Total</b>                     | 57 % | 39 % | 2 % | 0 % | 1 % | 100 % | 56 % | 33 % | 9 % | 2 % | 0 % | 100 % |                  |
